# Supplementary material for: Unexpected structures of the Au17 gold cluster: the stars are shining
Source: Royal Society of Chemistry journal article supplement (doi:10.1039/d2cc00891b), 2022-01-01
Supplement: d2cc00891b1.pdf [file d2cc00891b1.pdf]

**Supplementary Information**  
**Unexpected structures of the Au<sub>17</sub> gold cluster:**  
**The stars are shining**

**Pham Vu Nhat,<sup>a,\*</sup> Nguyen Thanh Si,<sup>a</sup> Vitaly G. Kiselev,<sup>b,c</sup> Hung Tan Pham,<sup>d</sup>  
André Fielicke<sup>e</sup> and Minh Tho Nguyen<sup>f,\*</sup>**

<sup>[a]</sup> Department of Chemistry, Can Tho University, Can Tho, Viet Nam

<sup>[b]</sup> Novosibirsk State University, 1 Pirogova Str., 630090 Novosibirsk, Russia

<sup>[c]</sup> Institute of Chemical Kinetics and Combustion SB RAS, 3 Institutskaya Str., 630090  
Novosibirsk, Russia

<sup>[d]</sup> Department of Chemistry, KU Leuven, Celestijnenlaan 200F, B-3001 Leuven, Belgium

<sup>[e]</sup> Fritz-Haber-Institut der Max-Planck-Gesellschaft, Faradayweg 4–6, D-14195 Berlin, Germany

<sup>[f]</sup> Institute for Computational Science and Technology (ICST), Ho Chi Minh City, Vietnam.

Email: tho.nm@icst.org.vn; minh.nguyen@kuleuven.be

## Experimental and Computational Details.

**Experiment:** Neutral gold clusters are produced by pulsed laser vaporization (10 Hz) in a continuous stream of He containing 1.5 % Kr at a total stagnation pressure of about 10 mbar in the source channel held at 100 K. After expansion into vacuum and passing a differential pumping stage the clusters are ionized using 7.9 eV photons emitted from an F<sub>2</sub> laser. The ionized distribution of bare clusters and complexes with Kr atoms is analysed by an orthogonal extraction reflectron time-of-flight mass spectrometer. Just before ionization, the clusters can be irradiated with the intense and tuneable IR radiation emitted from the “Free Electron Laser for Infrared eXperiments” (FELIX) that is scanned in this study of Au clusters between 47 cm<sup>-1</sup> and 220 cm<sup>-1</sup>. This range is characteristic for the vibrational modes of gold clusters. Resonant absorption of one or multiple far-IR photons by the Kr complex of an Au cluster can induce dissociation of the complex, which leads to an intensity reduction in the mass spectrum. Mass spectra with and without FEL interaction are recorded alternatingly to minimize the effect of fluctuations in the cluster signal intensity on the depletion spectra. Details on the experiment and the data evaluation procedure have been given before.<sup>1</sup>

**Computation.** Quantum chemical computations are carried out using a range of density functional (DFT)<sup>2-11</sup> and wavefunction (coupled-cluster) theory<sup>12, 13</sup> approaches. The DFT functionals employed include the PW91,<sup>6</sup> PBE,<sup>7</sup> TPSS,<sup>8</sup> revTPSS,<sup>11</sup> and M06<sup>10</sup> in conjunction with the correlation consistent cc-pVDZ-PP basis set,<sup>14</sup> which is used together with the small-core relativistic pseudopotential of Figgen *et al.*<sup>15</sup> with 60 electrons of Au being treated as a core. All stationary points are characterized to be true energy minima by harmonic vibrational analysis. Albeit it is quite successful in predicting the preferred structures of small gold clusters, density functional theory (DFT) still has several inherent shortcomings rendering the energy order of various isomers strongly dependent on a particular exchange-correlation functional employed. As for a further benchmark, calculations using the explicitly correlated local coupled cluster theory PNO-LCCSD(T)-F12<sup>13,16, 17</sup> are also performed for low-lying isomers using their DFT optimized geometries. This is a recently developed approximation of the conventional CCSD(T) constructed including two components. The former is using the local pair and domain approximations exploiting the short-range nature of dynamical correlation. Such a local correlation is based on pair natural orbitals and then combined with the explicit correlation F12 technique whose terms are also correct for part of the domain errors. The performance of this method for different types of

compounds was well documented.<sup>16, 17</sup> All computations are carried out using the Gaussian 16<sup>18</sup> and Molpro 2020<sup>19-21</sup> programs.

In the PNO-LCCSD(T)-F12b wavefunctions for the doublet state of Au<sub>17</sub>, the aug-cc-pVDZ-PP (denoted as aVDZ-PP) and aug-cc-pVTZ-PP (aVTZ-PP) basis sets are used, the core orbitals defined above are frozen, the same active space is used for all isomers, and the restricted-open shell reference formalism (ROHF) is used in the correlation calculations.

For ease of comparison with the experimental data, the calculated infrared stick spectra are convoluted with a Gaussian<sup>2</sup> line-shape function with a full width at half maximum of ... cm<sup>-1</sup>.

| Isomer                                                                                                                    | Method/Reference                      |
|---------------------------------------------------------------------------------------------------------------------------|---------------------------------------|
| 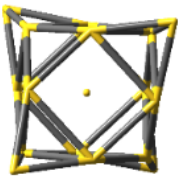<br><b>17_6</b> <i>D</i> <sub>2d</sub>   | TPSS <sup>3</sup>                     |
| <br><b>17_3</b> <i>C</i> <sub>2v</sub> | PBE <sup>9, 22</sup>                  |
| <br><b>17_7</b> <i>C</i> <sub>s</sub>  | PW91, <sup>4</sup> BB95 <sup>23</sup> |

**Fig. S1.** Some structural motifs previously assigned as the most stable form of Au<sub>17</sub>. The labeling is given according to structures displayed in Figure 1 of the main text.

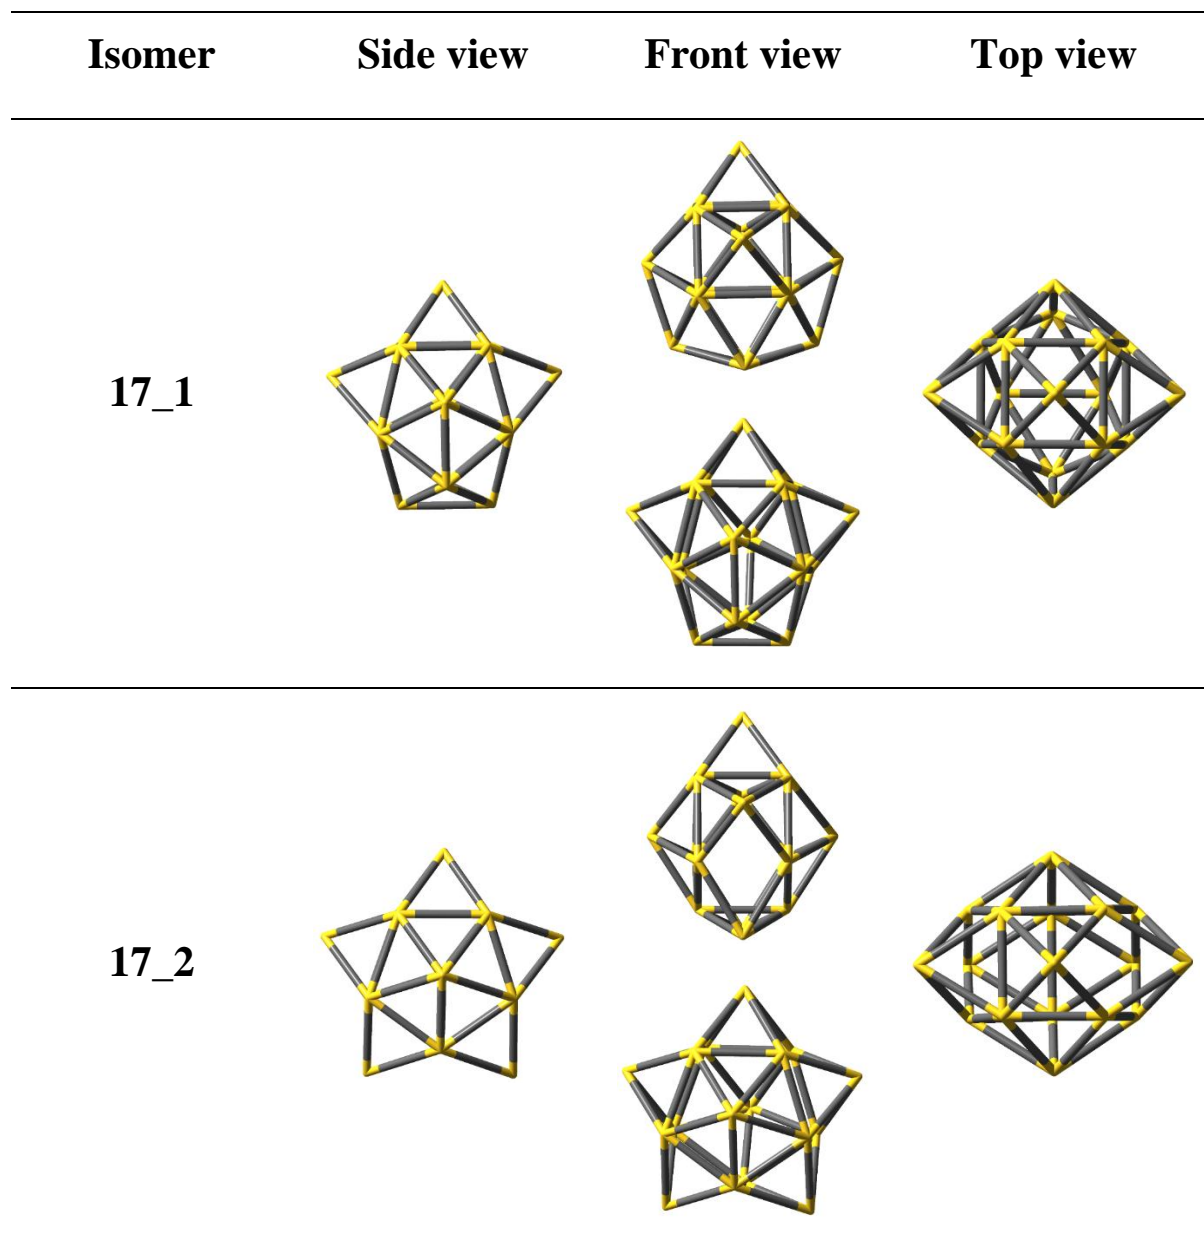

**Fig. S2:** Star-like isomers 17\_1 and 17\_2 seen in different perspectives.

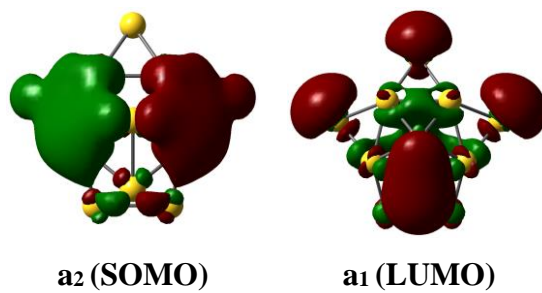

**Fig. S3.** Isosurfaces (0.02 a.u.) of frontier orbitals in the 17\_1 isomer.

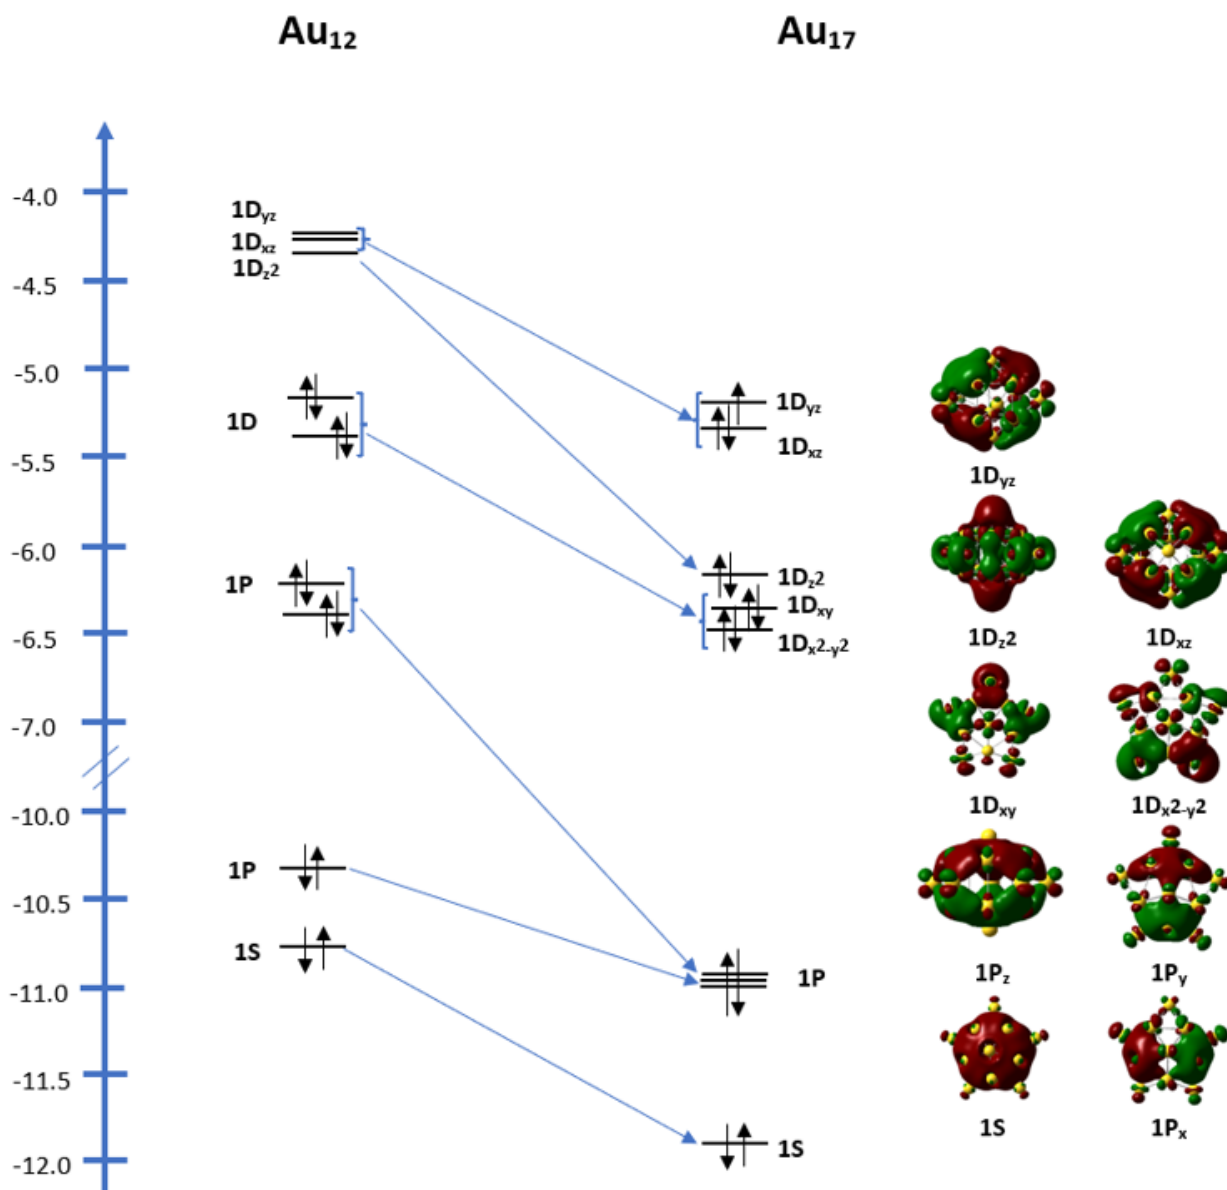

**Fig. S4.** An orbital correlation diagram between the Au<sub>12</sub> core (a pentaprism with two Au atoms attached on both faces) and Au<sub>17</sub> star cluster **17\_2**. The five Au atoms string is omitted as they do not have any interaction. Shapes of the shell orbitals are given, but they are not displayed in any energy ordering.

**Table S1.** Low-lying isomers of the Au<sub>17</sub> cluster and their Cartesian coordinates (in Å) located using TPSS/cc-pVDZ-PP geometry optimizations.

| Isomer                                                                                                                             | Cartesian coordinates |              |              |              |
|------------------------------------------------------------------------------------------------------------------------------------|-----------------------|--------------|--------------|--------------|
| 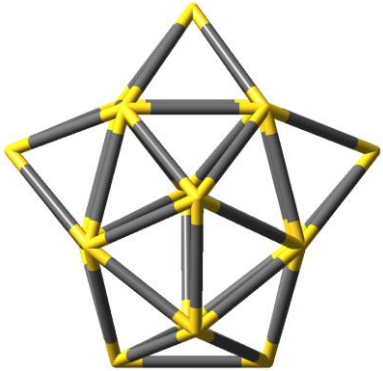 <p style="text-align: center;"><b>17_1</b></p>   | 79                    | 1.377657000  | 1.922706000  | 1.425639000  |
|                                                                                                                                    | 79                    | 0.000040000  | -2.417089000 | -2.261997000 |
|                                                                                                                                    | 79                    | -2.042883000 | -0.772138000 | -1.418461000 |
|                                                                                                                                    | 79                    | -1.377702000 | 1.922665000  | -1.425621000 |
|                                                                                                                                    | 79                    | 2.042896000  | -0.772073000 | -1.418480000 |
|                                                                                                                                    | 79                    | 1.377657000  | 1.922706000  | -1.425639000 |
|                                                                                                                                    | 79                    | -0.000038000 | 3.862791000  | 0.000000000  |
|                                                                                                                                    | 79                    | -1.453776000 | -3.068487000 | 0.000000000  |
|                                                                                                                                    | 79                    | 2.042896000  | -0.772073000 | 1.418480000  |
|                                                                                                                                    | 79                    | 3.573572000  | 1.044743000  | 0.000000000  |
|                                                                                                                                    | 79                    | -1.377702000 | 1.922665000  | 1.425621000  |
|                                                                                                                                    | 79                    | -0.000013000 | 0.208301000  | 3.098493000  |
|                                                                                                                                    | 79                    | -3.573612000 | 1.044639000  | 0.000000000  |
|                                                                                                                                    | 79                    | -0.000013000 | 0.208301000  | -3.098493000 |
|                                                                                                                                    | 79                    | 1.453862000  | -3.068425000 | 0.000000000  |
|                                                                                                                                    | 79                    | 0.000040000  | -2.417089000 | 2.261997000  |
|                                                                                                                                    | 79                    | -2.042883000 | -0.772138000 | 1.418461000  |
|  <p style="text-align: center;"><b>17_2</b></p>  | 79                    | 0.000000000  | 2.945366000  | 0.005946000  |
|                                                                                                                                    | 79                    | -2.190363000 | -1.416743000 | -0.727884000 |
|                                                                                                                                    | 79                    | 3.613550000  | 0.000000000  | 1.193858000  |
|                                                                                                                                    | 79                    | 1.362349000  | 1.447830000  | 1.911960000  |
|                                                                                                                                    | 79                    | 2.190363000  | 1.416743000  | -0.727884000 |
|                                                                                                                                    | 79                    | -1.362349000 | -1.447830000 | 1.911960000  |
|                                                                                                                                    | 79                    | -1.362349000 | 1.447830000  | 1.911960000  |
|                                                                                                                                    | 79                    | -3.613550000 | 0.000000000  | 1.193858000  |
|                                                                                                                                    | 79                    | 0.000000000  | 1.484610000  | -2.369677000 |
|                                                                                                                                    | 79                    | -2.190363000 | 1.416743000  | -0.727884000 |
|                                                                                                                                    | 79                    | 0.000000000  | 0.000000000  | 3.842980000  |
|                                                                                                                                    | 79                    | 0.000000000  | -1.484610000 | -2.369677000 |
|                                                                                                                                    | 79                    | 0.000000000  | -2.945366000 | 0.005946000  |
|                                                                                                                                    | 79                    | 2.190363000  | -1.416743000 | -0.727884000 |
|                                                                                                                                    | 79                    | -2.208149000 | 0.000000000  | -3.119768000 |
|                                                                                                                                    | 79                    | 2.208149000  | 0.000000000  | -3.119768000 |
|                                                                                                                                    | 79                    | 1.362349000  | -1.447830000 | 1.911960000  |
|  <p style="text-align: center;"><b>17_3</b></p> | 79                    | 2.088823000  | 1.424793000  | -0.557842000 |
|                                                                                                                                    | 79                    | -1.387613000 | -2.388575000 | 1.911902000  |
|                                                                                                                                    | 79                    | -2.088823000 | -1.424793000 | -0.557842000 |
|                                                                                                                                    | 79                    | 0.000000000  | -1.425559000 | -2.401268000 |
|                                                                                                                                    | 79                    | 1.387613000  | -2.388575000 | 1.911902000  |
|                                                                                                                                    | 79                    | 2.088823000  | -1.424793000 | -0.557842000 |
|                                                                                                                                    | 79                    | 2.324552000  | 0.000000000  | -2.897643000 |
|                                                                                                                                    | 79                    | -2.722943000 | 0.000000000  | 1.761119000  |
|                                                                                                                                    | 79                    | 1.387613000  | 2.388575000  | 1.911902000  |
|                                                                                                                                    | 79                    | 2.722943000  | 0.000000000  | 1.761119000  |
|                                                                                                                                    | 79                    | 0.000000000  | 1.425559000  | -2.401268000 |
|                                                                                                                                    | 79                    | 0.000000000  | 3.254636000  | -0.357066000 |
|                                                                                                                                    | 79                    | -2.324552000 | 0.000000000  | -2.897643000 |
|                                                                                                                                    | 79                    | 0.000000000  | -3.254636000 | -0.357066000 |
|                                                                                                                                    | 79                    | 0.000000000  | 0.000000000  | 2.373475000  |

|                                                                                                                                    |              |              |              |              |
|------------------------------------------------------------------------------------------------------------------------------------|--------------|--------------|--------------|--------------|
|                                                                                                                                    | 79           | -1.387613000 | 2.388575000  | 1.911902000  |
|                                                                                                                                    | 79           | -2.088823000 | 1.424793000  | -0.557842000 |
| 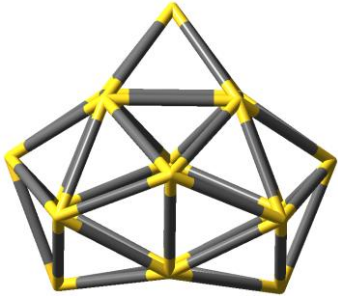 <p style="text-align: center;"><b>17_4</b></p>   | 79           | 0.000000000  | 3.298500000  | 0.191288000  |
|                                                                                                                                    | 79           | -2.354857000 | -2.283310000 | -0.756841000 |
|                                                                                                                                    | 79           | 3.394608000  | 0.000000000  | 0.391376000  |
|                                                                                                                                    | 79           | 1.407479000  | 1.406448000  | 1.698619000  |
|                                                                                                                                    | 79           | 2.354857000  | 2.283310000  | -0.756841000 |
|                                                                                                                                    | 79           | -1.407479000 | -1.406448000 | 1.698619000  |
|                                                                                                                                    | 79           | -1.407479000 | 1.406448000  | 1.698619000  |
|                                                                                                                                    | 79           | -3.394608000 | 0.000000000  | 0.391376000  |
|                                                                                                                                    | 79           | 0.000000000  | 1.405728000  | -1.957562000 |
|                                                                                                                                    | 79           | -2.354857000 | 2.283310000  | -0.756841000 |
|                                                                                                                                    | 79           | 0.000000000  | 0.000000000  | 3.597245000  |
|                                                                                                                                    | 79           | 0.000000000  | -1.405728000 | -1.957562000 |
|                                                                                                                                    | 79           | 0.000000000  | -3.298500000 | 0.191288000  |
|                                                                                                                                    | 79           | 2.354857000  | -2.283310000 | -0.756841000 |
|                                                                                                                                    | 79           | -2.342013000 | 0.000000000  | -2.307280000 |
|                                                                                                                                    | 79           | 2.342013000  | 0.000000000  | -2.307280000 |
| 79                                                                                                                                 | 1.407479000  | -1.406448000 | 1.698619000  |              |
|  <p style="text-align: center;"><b>17_5</b></p>  | 79           | -0.377517000 | -1.901786000 | 1.439588000  |
|                                                                                                                                    | 79           | 2.339363000  | -2.255494000 | 0.905321000  |
|                                                                                                                                    | 79           | 1.260881000  | 1.122667000  | -1.827211000 |
|                                                                                                                                    | 79           | 0.457987000  | -3.034573000 | -0.926330000 |
|                                                                                                                                    | 79           | 1.599954000  | -0.404828000 | 2.807384000  |
|                                                                                                                                    | 79           | -1.071768000 | 0.298035000  | 3.008756000  |
|                                                                                                                                    | 79           | 0.056541000  | -1.088913000 | -2.908363000 |
|                                                                                                                                    | 79           | 2.394296000  | 3.046126000  | -0.217609000 |
|                                                                                                                                    | 79           | -1.864895000 | -1.633667000 | -0.972946000 |
|                                                                                                                                    | 79           | -2.032044000 | 1.535442000  | 0.683897000  |
|                                                                                                                                    | 79           | 2.555886000  | -1.317069000 | -1.710607000 |
|                                                                                                                                    | 79           | -1.519436000 | 0.983289000  | -2.040007000 |
|                                                                                                                                    | 79           | 2.830310000  | 0.419638000  | 0.433696000  |
|                                                                                                                                    | 79           | 0.618126000  | 1.820338000  | 1.482389000  |
|                                                                                                                                    | 79           | -0.361780000 | 3.155530000  | -0.763171000 |
|                                                                                                                                    | 79           | -3.901032000 | 0.209976000  | -0.880316000 |
| 79                                                                                                                                 | -2.984873000 | -0.954712000 | 1.485527000  |              |
|  <p style="text-align: center;"><b>17_6</b></p> | 79           | 1.393639000  | -1.541280000 | 1.944435000  |
|                                                                                                                                    | 79           | 2.863019000  | 0.000000000  | -0.009261000 |
|                                                                                                                                    | 79           | 1.393639000  | 1.541280000  | 1.944435000  |
|                                                                                                                                    | 79           | -1.393639000 | -1.541280000 | 1.944435000  |
|                                                                                                                                    | 79           | -1.393639000 | 1.541280000  | 1.944435000  |
|                                                                                                                                    | 79           | 0.000000000  | 0.000000000  | 0.000000000  |
|                                                                                                                                    | 79           | 1.541280000  | 1.393639000  | -1.944435000 |
|                                                                                                                                    | 79           | 0.000000000  | 2.863019000  | 0.009261000  |
|                                                                                                                                    | 79           | -2.863019000 | 0.000000000  | -0.009261000 |
|                                                                                                                                    | 79           | -1.541280000 | 1.393639000  | -1.944435000 |
|                                                                                                                                    | 79           | 1.541280000  | -1.393639000 | -1.944435000 |
|                                                                                                                                    | 79           | -1.541280000 | -1.393639000 | -1.944435000 |
|                                                                                                                                    | 79           | 0.000000000  | -2.863019000 | 0.009261000  |
|                                                                                                                                    | 79           | 0.000000000  | 3.527090000  | -2.628629000 |
|                                                                                                                                    | 79           | -3.527090000 | 0.000000000  | 2.628629000  |
|                                                                                                                                    | 79           | 0.000000000  | -3.527090000 | -2.628629000 |
| 79                                                                                                                                 | 3.527090000  | 0.000000000  | 2.628629000  |              |

|                                                                                                                                    |              |              |              |              |
|------------------------------------------------------------------------------------------------------------------------------------|--------------|--------------|--------------|--------------|
| 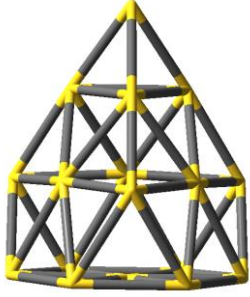 <p style="text-align: center;"><b>17_7</b></p>   | 79           | 2.483139000  | -1.873888000 | 1.371638000  |
|                                                                                                                                    | 79           | 0.058269000  | -2.001809000 | 2.834342000  |
|                                                                                                                                    | 79           | -2.300922000 | -2.205958000 | 1.392675000  |
|                                                                                                                                    | 79           | -2.300922000 | -2.205958000 | -1.392675000 |
|                                                                                                                                    | 79           | 0.058269000  | -2.001809000 | -2.834342000 |
|                                                                                                                                    | 79           | 2.483139000  | -1.873888000 | -1.371638000 |
|                                                                                                                                    | 79           | 0.089813000  | -2.056828000 | 0.000000000  |
|                                                                                                                                    | 79           | 1.541688000  | 0.382563000  | 2.762618000  |
|                                                                                                                                    | 79           | 2.008376000  | 0.520200000  | 0.000000000  |
|                                                                                                                                    | 79           | 1.541688000  | 0.382563000  | -2.762618000 |
|                                                                                                                                    | 79           | -0.951680000 | 0.299113000  | 1.612559000  |
|                                                                                                                                    | 79           | -3.179018000 | 0.090639000  | 0.000000000  |
|                                                                                                                                    | 79           | -0.951680000 | 0.299113000  | -1.612559000 |
|                                                                                                                                    | 79           | 0.752879000  | 2.579208000  | -1.421024000 |
|                                                                                                                                    | 79           | 0.752879000  | 2.579208000  | 1.421024000  |
|                                                                                                                                    | 79           | -1.813387000 | 2.431238000  | 0.000000000  |
| 79                                                                                                                                 | -0.272531000 | 4.656290000  | 0.000000000  |              |
|  <p style="text-align: center;"><b>17_8</b></p>   | 79           | -0.049610000 | -2.677579000 | 3.689033000  |
|                                                                                                                                    | 79           | -0.910830000 | -0.284490000 | 2.800108000  |
|                                                                                                                                    | 79           | -1.423794000 | -2.829953000 | 1.328969000  |
|                                                                                                                                    | 79           | -1.539950000 | 1.991533000  | 1.478455000  |
|                                                                                                                                    | 79           | -1.194598000 | -0.391054000 | 0.000000000  |
|                                                                                                                                    | 79           | -2.122121000 | 4.181612000  | 0.000000000  |
|                                                                                                                                    | 79           | -1.423794000 | -2.829953000 | -1.328969000 |
|                                                                                                                                    | 79           | 1.170538000  | -1.834517000 | 1.359400000  |
|                                                                                                                                    | 79           | 1.073304000  | 1.041393000  | 1.423960000  |
|                                                                                                                                    | 79           | -1.539950000 | 1.991533000  | -1.478455000 |
|                                                                                                                                    | 79           | 0.517139000  | 3.434429000  | 0.000000000  |
|                                                                                                                                    | 79           | -0.910830000 | -0.284490000 | -2.800108000 |
|                                                                                                                                    | 79           | 1.073304000  | 1.041393000  | -1.423960000 |
|                                                                                                                                    | 79           | -0.049610000 | -2.677579000 | -3.689033000 |
|                                                                                                                                    | 79           | 1.170538000  | -1.834517000 | -1.359400000 |
|                                                                                                                                    | 79           | 3.057467000  | 2.365460000  | 0.000000000  |
| 79                                                                                                                                 | 3.102796000  | -0.403221000 | 0.000000000  |              |
|  <p style="text-align: center;"><b>17_9</b></p> | 79           | -0.499196000 | -0.941697000 | -1.855659000 |
|                                                                                                                                    | 79           | 2.179600000  | -0.109778000 | -1.954278000 |
|                                                                                                                                    | 79           | 1.274617000  | -2.541814000 | -0.394261000 |
|                                                                                                                                    | 79           | -3.095412000 | -0.707419000 | -0.794738000 |
|                                                                                                                                    | 79           | -1.274612000 | -2.541814000 | 0.394270000  |
|                                                                                                                                    | 79           | 2.008034000  | 1.843203000  | 0.138359000  |
|                                                                                                                                    | 79           | -0.211937000 | 1.771931000  | 1.942304000  |
|                                                                                                                                    | 79           | 3.095411000  | -0.707410000 | 0.794738000  |
|                                                                                                                                    | 79           | 0.211936000  | 1.771920000  | -1.942306000 |
|                                                                                                                                    | 79           | 0.499197000  | -0.941689000 | 1.855660000  |
|                                                                                                                                    | 79           | 3.833559000  | -2.217065000 | -1.309545000 |
|                                                                                                                                    | 79           | -0.000030000 | 3.786446000  | -0.000090000 |
|                                                                                                                                    | 79           | -2.008036000 | 1.843199000  | -0.138362000 |
|                                                                                                                                    | 79           | -2.179599000 | -0.109772000 | 1.954275000  |
|                                                                                                                                    | 79           | -3.833555000 | -2.217064000 | 1.309553000  |
|                                                                                                                                    | 79           | -2.366950000 | 1.009406000  | -2.758716000 |
| 79                                                                                                                                 | 2.366948000  | 1.009417000  | 2.758715000  |              |



## References

1. P. Gruene, B. Butschke, J. T. Lyon, D. M. Rayner and A. Fielicke, *Z. Phys. Chem.*, 2014, **228**, 337-350.
2. Y. Gao and X. C. Zeng, *J. Am. Chem. Soc.*, 2005, **127**, 3698-3699.
3. L. Yan, L. Cheng and J. Yang, *J. Phys. Chem. C*, 2015, **119**, 23274-23278.
4. S. Li, S. Singh, J. A. Dumesic and M. Mavrikakis, *Catal. Sci. Technol.*, 2019, **9**, 2836-2848.
5. C. Tang, W. Zhu, K. Zhang, X. He and F. Zhu, *Comput. Theor. Chem.*, 2014, **1049**, 62-66.
6. J. P. Perdew and Y. Wang, *Phys. Rev. B*, 1992, **45**, 13244-13249.
7. J. P. Perdew, K. Burke and M. Ernzerhof, *Phys. Rev. Lett.*, 1996, **77**, 3865.
8. J. Tao, J. P. Perdew, V. N. Staroverov and G. E. Scuseria, *Phys. Rev. Lett.*, 2003, **91**, 146401.
9. S. Bulusu and X. C. Zeng, *J. Chem. Phys.*, 2006, **125**, 154303.
10. Y. Zhao and D. G. Truhlar, *Theor. Chem. Acc.*, 2008, **120**, 215-241.
11. J. P. Perdew, A. Ruzsinszky, G. I. Csonka, L. A. Constantin and J. Sun, *Phys. Rev. Lett.*, 2009, **103**, 026403.
12. K. A. Peterson, *J. Chem. Phys.*, 2003, **119**, 11099-11112.
13. Q. Ma and H.-J. Werner, *J. Chem. Theory Comput.*, 2018, **14**, 198-215.
14. K. A. Peterson and C. Puzzarini, *Theoretical Chemistry Accounts*, 2005, **114**, 283-296.
15. D. Figgen, G. Rauhut, M. Dolg and H. Stoll, *Chemical physics*, 2005, **311**, 227-244.
16. M. Schwilk, Q. Ma, C. Köppl and H.-J. Werner, *J. Chem. Theory Comput.*, 2017, **13**, 3650-3675.
17. Q. Ma and H. J. Werner, *Wiley Interdiscip. Rev. Comput. Mol. Sci.*, 2018, **8**, e1371.
18. M. J. Frisch, G. W. Trucks, H. B. Schlegel, G. E. Scuseria, M. A. Robb, J. R. Cheeseman, G. Scalmani, V. Barone, G. A. Petersson, H. Nakatsuji, X. Li, M. Caricato, A. V. Marenich, J. Bloino, B. G. Janesko, R. Gomperts, B. Mennucci, H. P. Hratchian, J. V. Ortiz, A. F. Izmaylov, J. L. Sonnenberg, Williams, F. Ding, F. Lipparini, F. Egidi, J. Goings, B. Peng, A. Petrone, T. Henderson, D. Ranasinghe, V. G. Zakrzewski, J. Gao, N. Rega, G. Zheng, W. Liang, M. Hada, M. Ehara, K. Toyota, R. Fukuda, J. Hasegawa, M. Ishida, T. Nakajima, Y. Honda, O. Kitao, H. Nakai, T. Vreven, K. Throssell, J. A. Montgomery Jr., J. E. Peralta, F. Ogliaro, M. J. Bearpark, J. J. Heyd, E. N. Brothers, K. N. Kudin, V. N. Staroverov, T. A. Keith, R. Kobayashi, J. Normand, K. Raghavachari, A. P. Rendell, J. C. Burant, S. S. Iyengar, J. Tomasi, M. Cossi, J. M. Millam, M. Klene, C. Adamo, R. Cammi, J. W. Ochterski, R. L. Martin, K. Morokuma, O. Farkas, J. B. Foresman and D. J. Fox, Gaussian 16 Rev. B.01, Gaussian, Inc., Wallingford CT, 2016.
19. H. J. Werner, P. J. Knowles, G. Knizia, F. R. Manby and M. Schütz, *Wiley Interdiscip. Rev. Comput. Mol. Sci.*, 2012, **2**, 242-253.
20. H.-J. Werner, P. J. Knowles, F. R. Manby, J. A. Black, K. Doll, A. Heßelmann, D. Kats, A. Köhn, T. Korona and D. A. Kreplin, *J. Chem. Phys.*, 2020, **152**, 144107.
21. H.-J. Werner, P. J. Knowles, G. Knizia, F. R. Manby, M. Schütz, P. Celani, W. Györffy, D. Kats, T. Korona, R. Lindh, A. Mitrushenkov, G. Rauhut, K. R. Shamasundar, T. B. Adler, R. D. Amos, S. J. Bennie, A. Bernhardsson, A. Berning, D. L. Cooper, M. J. O. Deegan, A. J. Dobbyn, F. Eckert, E. Goll, C. Hampel, A. Hesselmann, G. Hetzer, T. Hrenar, G. Jansen, C. Köppl, S. J. R. Lee, Y. Liu, A. W. Lloyd, Q. Ma, R. A. Mata, A. J. May, S. J. McNicholas, W. Meyer, T. F. M. III, M. E. Mura, A. Nicklass, D. P. O'Neill, P. Palmieri, D. Peng, K. Pflüger, R. Pitzer, M. Reiher, T. Shiozaki, H. Stoll, A. J. Stone, R. Tarroni, T. Thorsteinsson, M. Wang and M. Welborn, MOLPRO, version 2020.1, a package of ab initio programs, see <https://www.molpro.net>.
22. A. Yang, W. Fa and J. Dong, *Phys. Lett. A*, 2010, **374**, 4506-4511.
23. P. V. Nhat, N. T. Si, J. Leszczynski and M. T. Nguyen, *Chem. Phys.*, 2017, **493**, 140-148.
